# Supplementary material for: A Novel Core Effector Vp1 Promotes Fungal Colonization and Virulence of Ustilago maydis
Source: MDPI journal article supplement (doi:10.3390/jof7080589), 2021-07-23
Supplement: s1 [file s1]

# **A novel core effector Vp1 promotes fungal colonization and virulence of *Ustilago maydis***

**Cuong Van Hoang<sup>1,2,3</sup>, Chibbhi K. Bhaskar<sup>1,2,3</sup>, Lay-Sun Ma<sup>1,2,4\*</sup>**

<sup>1</sup> Institute of Plant and Microbial Biology, Academia Sinica, Taipei 11529, Taiwan;

<sup>2</sup> Molecular and Biological Agricultural Sciences Program, Taiwan International Graduate Program, National Chung Hsing University and Academia Sinica, Taipei 11529, Taiwan;

<sup>3</sup> Graduate Institute of Biotechnology, National Chung-Hsing University, Taichung 402, Taiwan;

<sup>4</sup> Biotechnology Center, National Chung Hsing University, Taichung 402, Taiwan;

\* Correspondence: laysunma@gate.sinica.edu.tw; Tel.: +886-2-2787-1145

## **Supporting information**

Figure S1- UmVp1 is important for *U. maydis* virulence

Figure S2- UmVp1 is not glycosylated

Figure S3- The analysis of Vp1 orthologs in smut-fungi

Figure S4- Secretion of Vp1-mCherry protein in plant apoplastic space

Figure S5- Subcellular localization of the GFP fused Vp1 proteins in maize protoplasts from healthy plants

Figure S6- Subcellular localization of GFP fused UmVp1, UhVp1 and UmVp1-nls proteins in *N. benthamiana* leaves

Figure S7- Gene expression profiling of *srvp1* by qRT-PCR

Table S1- Primers used in this study

Table S2- *U. maydis* strains used in this study

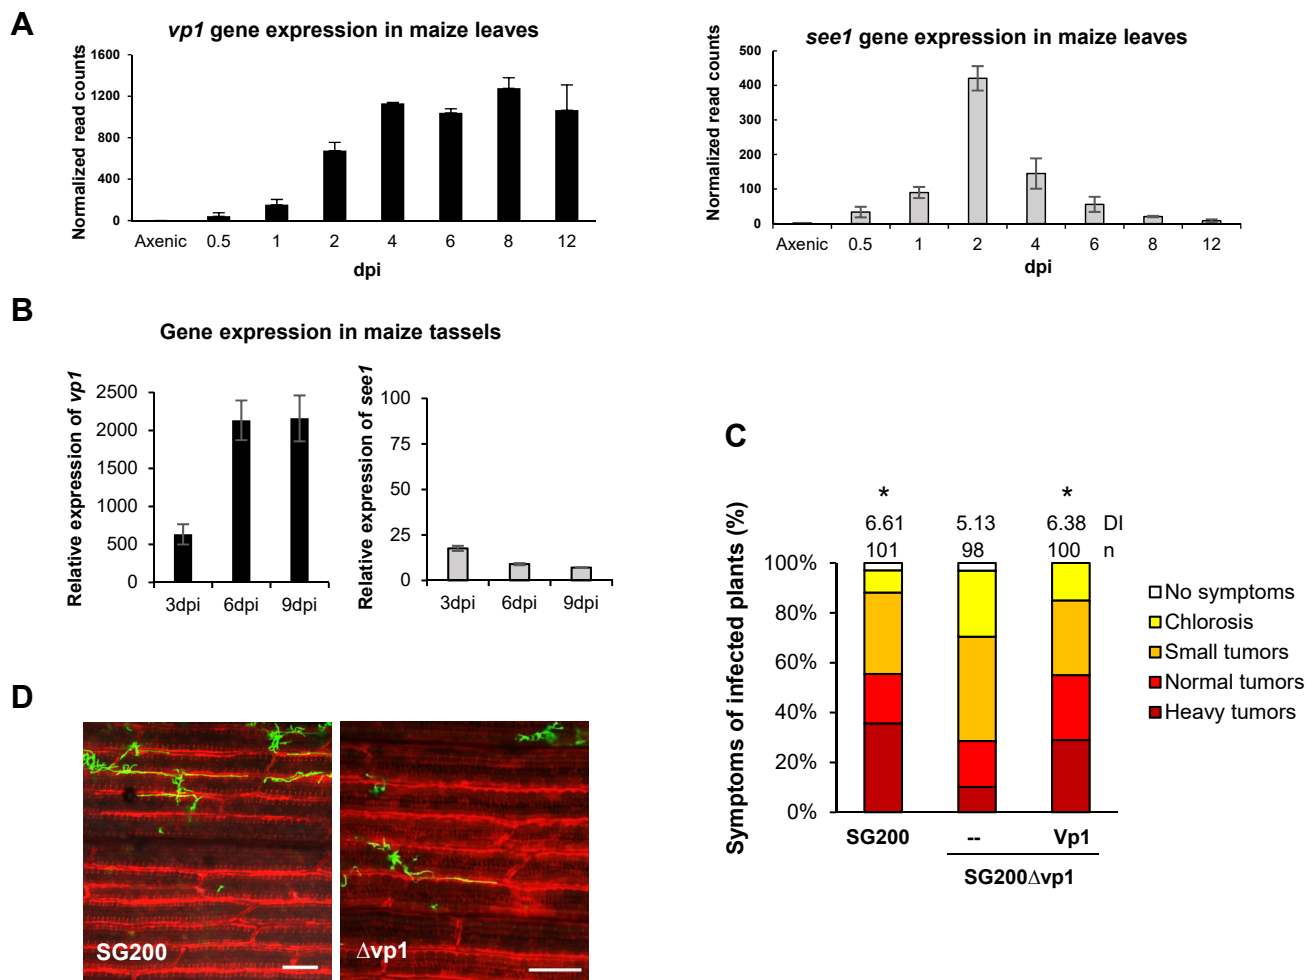

**Figure S1.** UmVp1 is important for *Ustilago maydis* virulence. The expression patterns of *umvp1* (UMAG00538) and *see1* (UMAG02239) genes were retrieved from RNA sequencing data generated from the maize leaves infected by the compatible FB1xFB2 strains [Lanver et al., 2018]. Error bars indicate  $\pm$ SD. **B.** Gene expression profiling of *vp1* and *see1* in maize tassels by qRT-PCR. The expression of *see1* gene not detected in tassels was served as negative control [Redkar et al., 2015]. Total RNA was extracted from maize tassels infected with SG200 at 3, 6 and 9 dpi. The constitutively expressed *U. maydis* peptidylprolyl isomerase (*ppi*) gene was used for normalization. The data represent the mean obtained from three independent experiments and the error bars depict  $\pm$  SD. **C.** The 7-day-old-maize seedlings of EGB variety were infected with the indicated strains and disease symptoms were scored at 10 dpi. n, total numbers of infected plants from the three independent infection assays; DI, average disease index of three independent infection assays; \* $P < 0.05$  indicates significant differences of disease symptoms in respective complementation strains compared with  $\Delta$ umvp1 determined by a two-tailed Student's *t*-test using the disease index values. **D.** Maize seedlings infected by the indicated *U. maydis* strains were observed at 2 dpi by confocal microscopy. Fungal hyphae were stained with WGA-AF488 (green). Plant cell walls were stained with propidium iodide (red). Bars: 200  $\mu$ m.

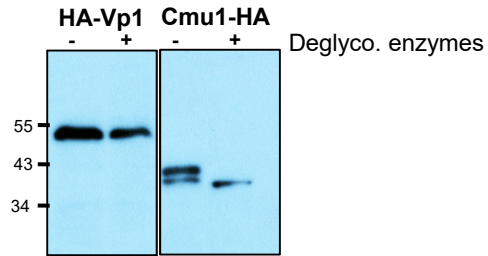

**Figure S2.** UmVp1 is not glycosylated. The TCA-precipitated HA-Vp1 or Cmu1-HA proteins were treated with (+) or without (-) deglycosylation enzyme mix (containing PNGase F, O-glycosidase,  $\beta$ 1-4 galactosidase,  $\beta$ -N-acetylglucosaminidase, and neuraminidase) according to the manufacturer's protocol (NEB Cat# P6039). Cmu1-HA served as positive controls [Djamei et al., 2011]. The protein samples were separated on SDS-PAGE and analyzed by western blotting using the anti-HA antibody.

Figure S3

A

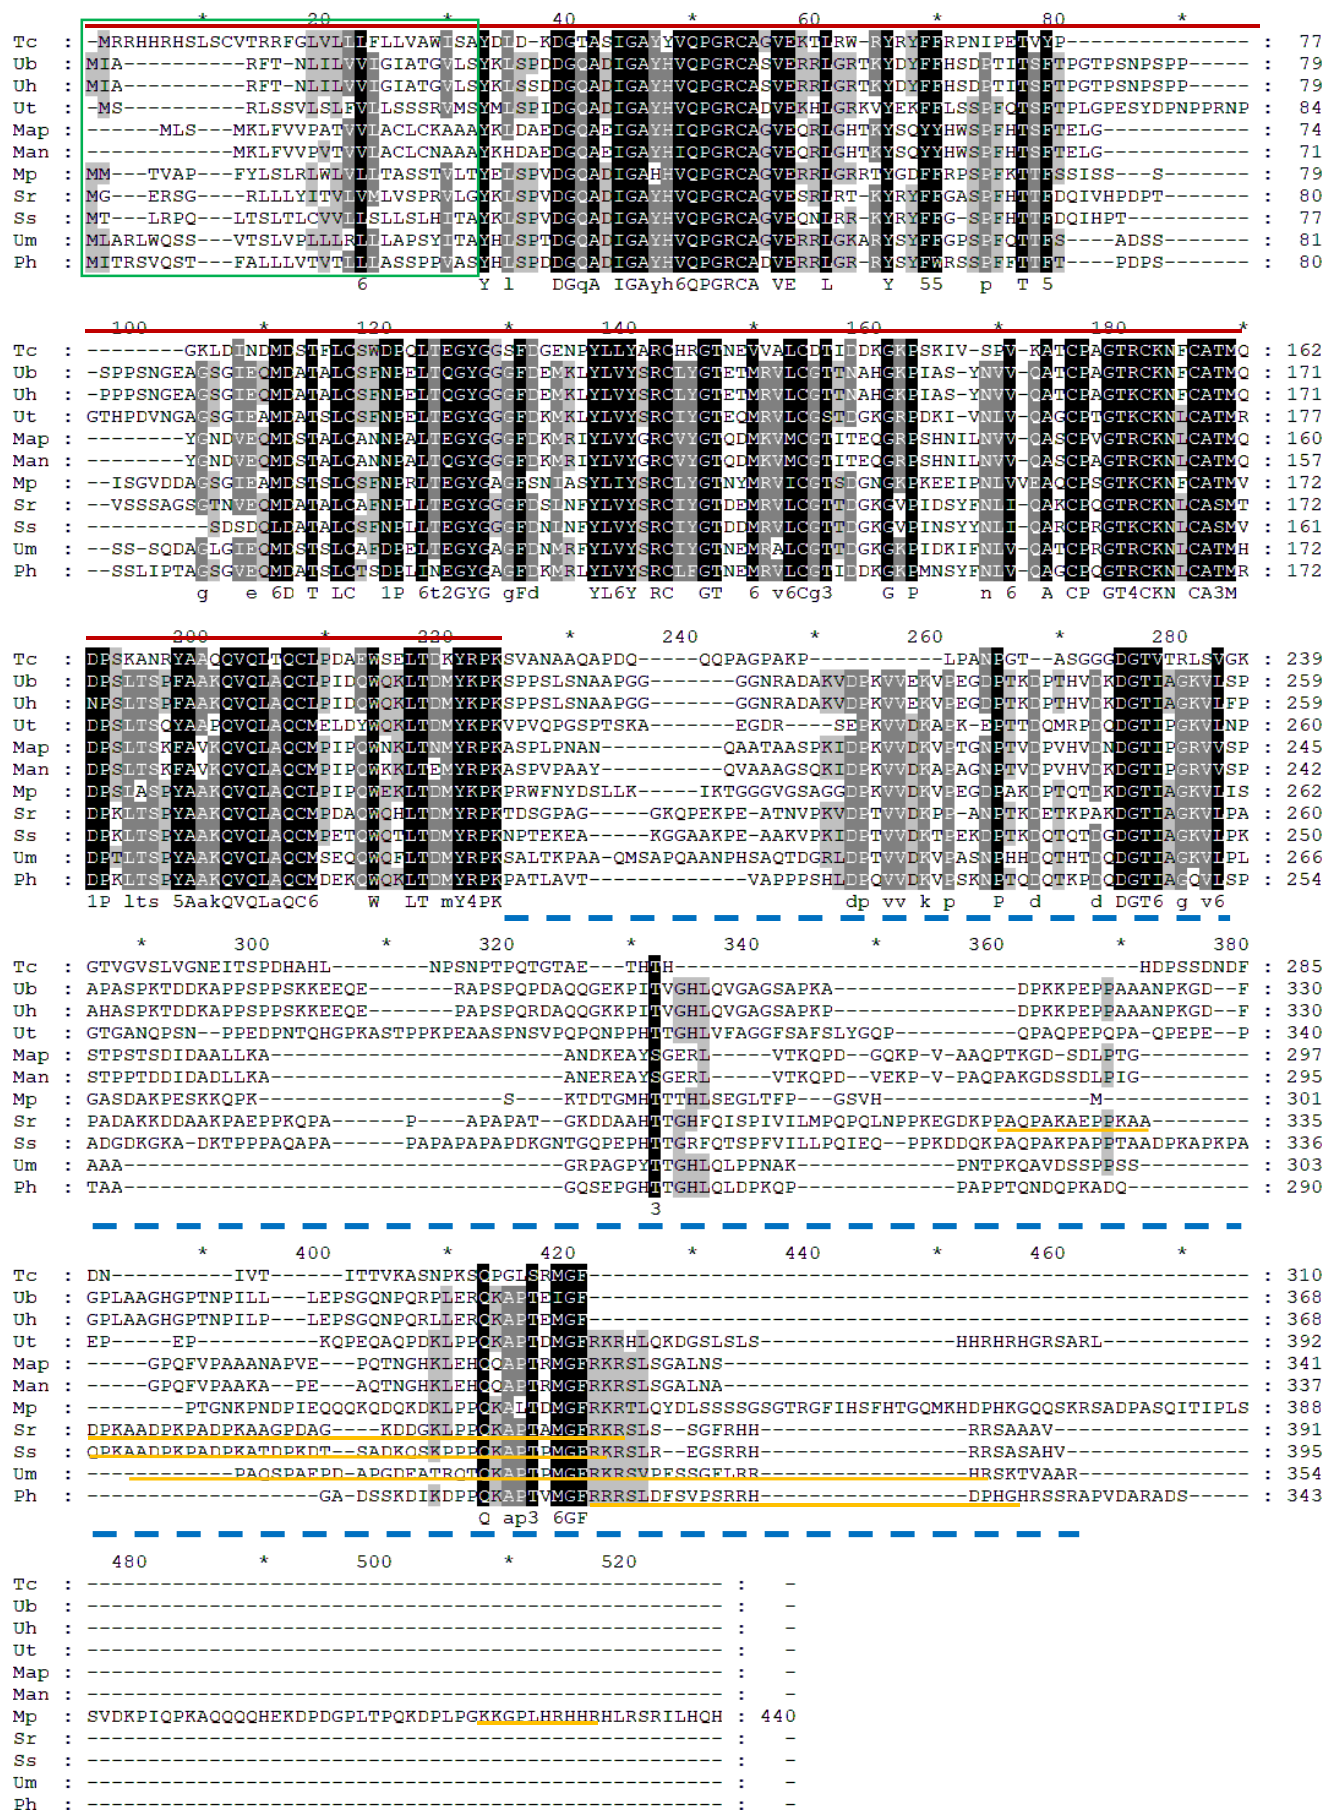

**Figure S3****B**

| Orthologs                                          | Coverage (%) | Identity (%) | E value for RBH |
|----------------------------------------------------|--------------|--------------|-----------------|
| <i>Pseudozyma hubeiensis</i><br>XP_012192856.1     | 80           | 58.8         | 6e-121          |
| <i>Sporisorium reilianum</i><br>CBQ67951.1         | 94           | 53.3         | 2e-109          |
| <i>Sporisorium scitamineum</i><br>CDU24160.1       | 93           | 50.77        | 3e-105          |
| <i>Melanopsichium pennsylvanicum</i><br>CDI51462.1 | 75           | 50.14        | 1e-93           |
| <i>Moesziomyces antarcticus</i><br>XP_014659418.1  | 92           | 45.87        | 4e-86           |
| <i>Moesziomyces aphidis</i><br>ETS63783.1          | 91           | 47.87        | 7e-88           |
| <i>Ustilago hordei</i><br>CAJ41947.1               | 64           | 59.35        | 4e-93           |
| <i>Ustilago trichophora</i><br>SPO21134.1          | 67           | 56.47        | 6e-91           |
| <i>Ustilago bromivora</i><br>SAM61624.1            | 66           | 60.2         | 8e-96           |
| <i>Testicularia cyperi</i><br>PWY98796.1           | 65           | 52.34        | 2e-57           |

**C**

|    | Vp1 orthologs                          | Signal peptide                  | Probability |
|----|----------------------------------------|---------------------------------|-------------|
| 1  | <i>Ustilago maydis</i>                 | MLARLWQSSVTSLVPLLLRLLAPSYITA    | 0.6638      |
| 2  | <i>Pseudozyma hubeiensis</i>           | MITRSVQSTFALLLVTVTLASSPPVAS     | 0.8060      |
| 3  | <i>Sporisorium reilianum</i> SRZ2      | MGERSGRLLLYITVLVMLVSPRVLG       | 0.9728      |
| 4  | <i>Sporisorium scitamineum</i>         | MTLRPQLTSLTLCVVLLSLLSHITA       | 0.8533      |
| 5  | <i>Ustilago bromivora</i>              | MIARFTNLILVVIGIATGVLS           | 0.8605      |
| 6  | <i>Ustilago hordei</i>                 | MIARFTNLILVVIGIATGVLS           | 0.8044      |
| 7  | <i>Melanopsichium pennsylvanicum</i> 4 | MMTVAPFYLSRLWLVLTTASSTVLT       | 0.7058      |
| 8  | <i>Moesziomyces aphidis</i>            | MLSMKLFVVPATVVLACLCKAAA         | 0.7541      |
| 9  | <i>Ustilago trichophora</i>            | MSRLSSVLSLFLVLLSSSRVMS          | 0.9201      |
| 10 | <i>Moesziomyces antarcticus</i> T-34   | MKLFVVPVTVVLACLCNAAA            | 0.6159      |
| 11 | <i>Testicularia cyperi</i>             | MRRHHRHSLSCVTRRFGLVLLLFLLVAWISA | 0.8794      |

**Figure S3.** The analysis of Vp1 orthologs in smut-fungi. **A.** The amino acid sequence alignments of Vp1 orthologs in related smut fungi. The full length sequences of the orthologs were obtained from NCBI database, aligned using Clustal Omega, and visualized using Genedoc. The predicted N-terminal signal peptides are boxed in green. The orange line indicates the predicted NLS in each ortholog by LOCALIZER (<http://localizer.csiro.au/>). The red line indicates the conserved N-terminal regions among orthologs. The blue dashed line indicates the disorder region of UmVp1 predicted by D<sup>2</sup>P<sup>2</sup> (<https://d2p2.pro/>). *Testicularia cyperi* (Tc) [Kijpornyongpan et al., 2018] ; *U. bromivora* (Ub) [Rabe et al., 2016]; *U. hordei* (Uh) [Laurie et al., 2012]; *U. trichophora* (Ut) [Zambanini et al., 2016]; *Moesziomyces aphidis* (Map) [Lorenz et al., 2014]; *Moesziomyces antarcticus* (Man) [Morita et al., 2013]; *Melanopsichium pennsylvanicum* (Mp) [Sharma et al., 2014]; *Sporisorium reilianum* (Sr) [Schirawski et al., 2010]; *Sporisorium scitamineum* (Ss) [Dutheil et al., 2016]; *Ustilago maydis* (Um) [Kamper et al., 2006]; *Pseudozyma hubeiensis* (Ph) [Konishi et al., 2013]. **B.** The Vp1 orthologs identified in smut fungi through a blastP analysis and reciprocal best blast hits (RBH) and OrthoDB search. **C.** Signal peptide sequences of Vp1 orthologs predicted by SignalP5.0 (<http://www.cbs.dtu.dk/services/SignalP/>) are shown.

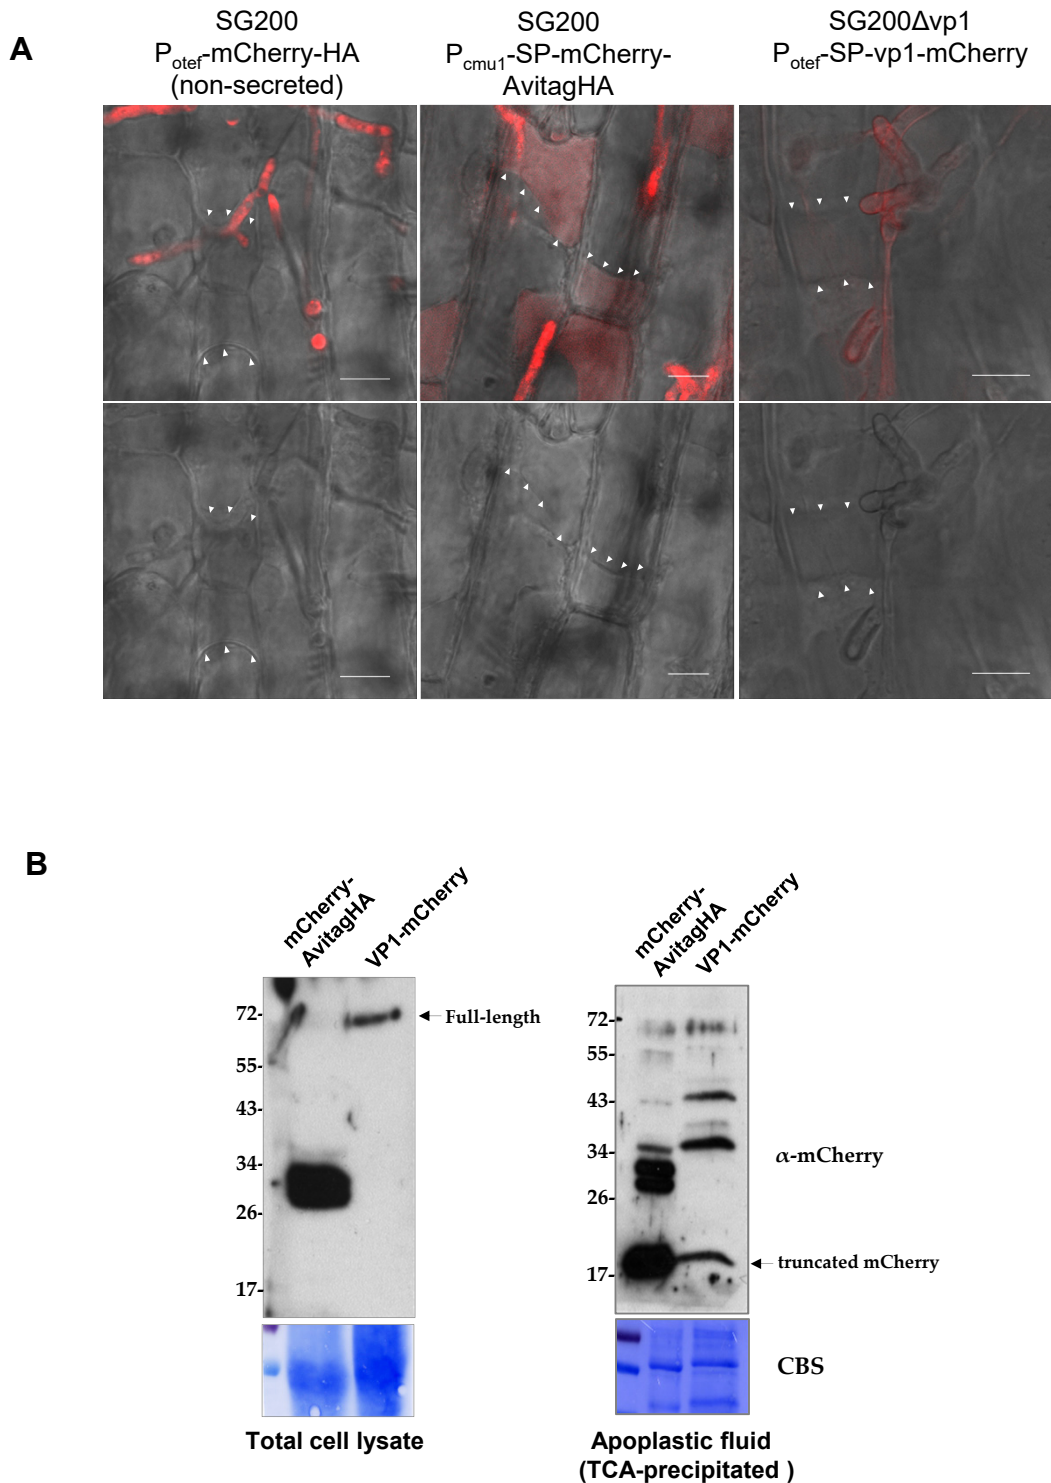

**Figure S4.** Secretion of Vp1-mCherry protein in plant apoplastic space. **A.** Maize leaves infected with the indicated strains were collected at 3 dpi. The mCherry fluorescence signals in plasmolysis area (indicated by arrows) were visualized by confocal microscopy (excitation at 561 nm and detection at 580-630 nm) after the leaves treated with 1M NaCl. Bar, 10  $\mu$ m. **B.** Infected leaves were collected at 3 dpi and the total proteins extracted by sample buffer and analyzed in immunoblots using antibody against mCherry epitope (Total cell lysate). Total proteins from apoplastic fluid were collected from infected leaves using vacuum-centrifugation method and TCA-precipitated. CBS: Coomassie blue staining as a loading control.



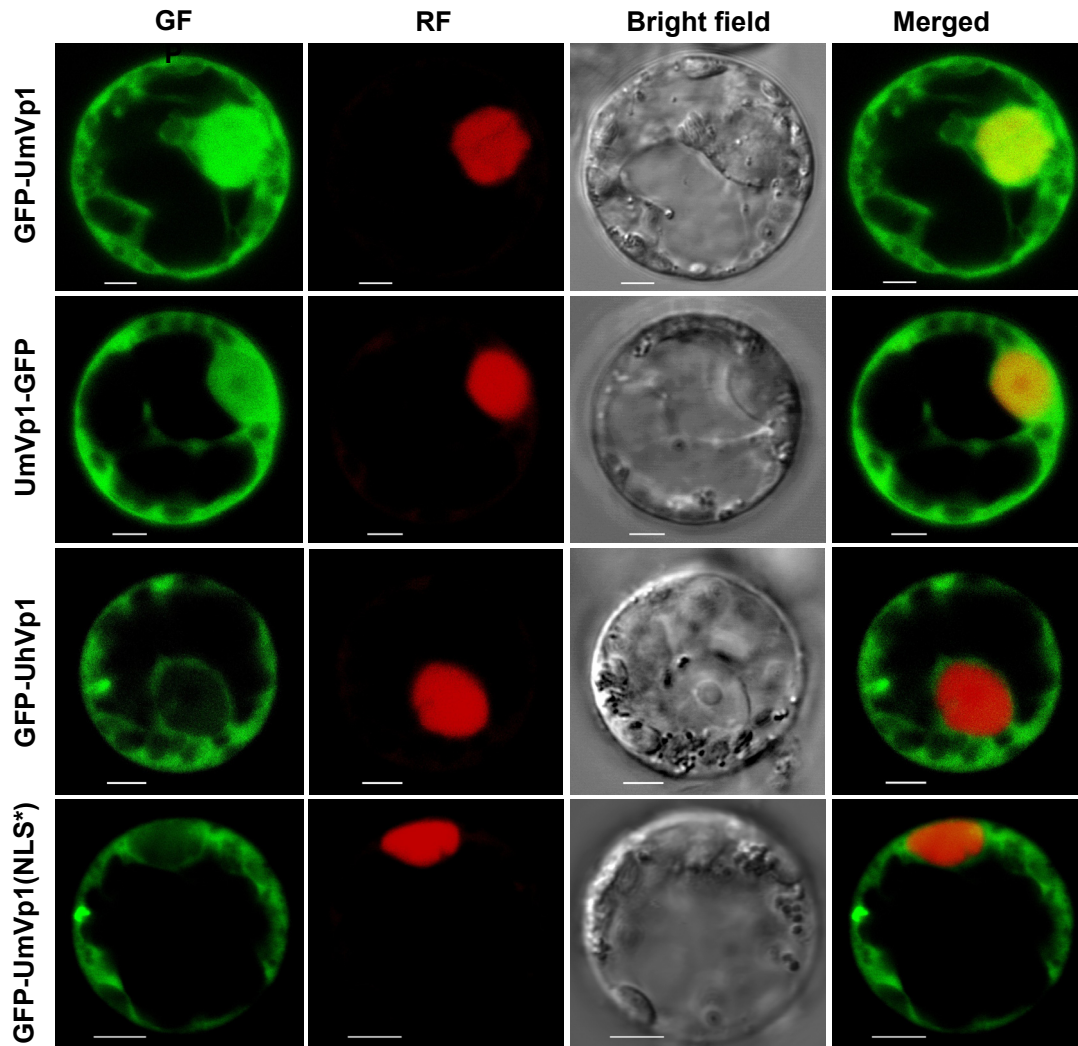

**Figure S5.** Subcellular localization of the GFP fused Vp1 proteins in maize protoplasts from healthy plants. GFP-tagged Vp1 and the nuclear marker 35s-RFP-VirD2NLS were co-expressed in maize protoplasts and visualized by confocal microscopy. Bars, 5  $\mu$ m.



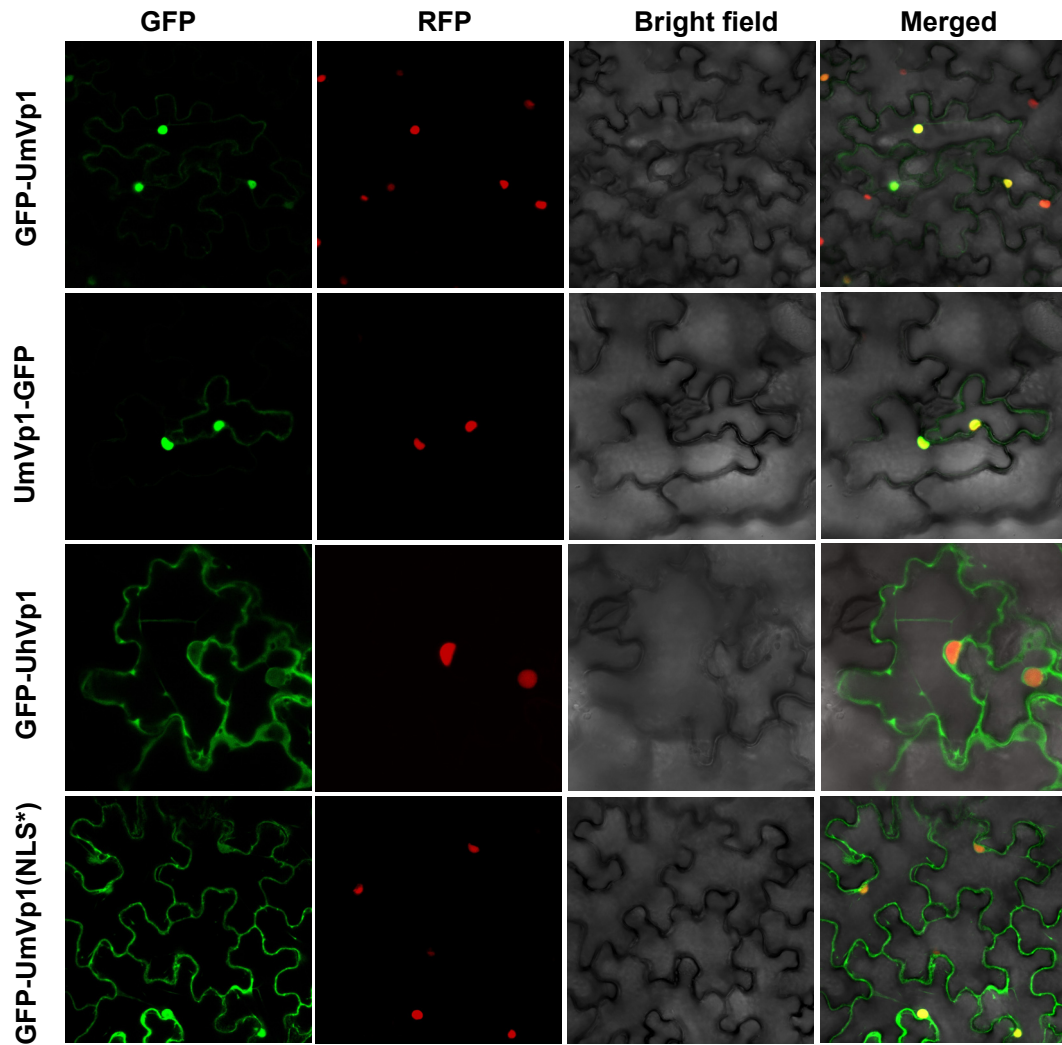

**Figure S6.** Subcellular localization of GFP fused UmVp1, UhVp1 and UmVp1-nls proteins in *N. benthamiana* leaves. The GFP-tagged Vp1 and the nuclear marker 35s-RFP-VirD2NLS were co-expressed *N. benthamiana* leaves and observed after 2 days of inoculation and visualized by confocal microscopy.

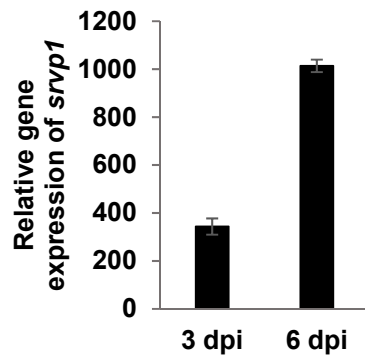

**Figure S7.** Gene expression profiling of *srvp1* by qRT-PCR. Total RNA was extracted from leaves infected with SG200 $\Delta$ vp1-*srvp1* at 3 and 6 dpi. The constitutively expressed *U. maydis* peptidylprolyl isomerase (*ppi*) gene was used for normalization. The data represent the mean obtained from three independent experiments and the error bars depict mean  $\pm$  SD.

**Table S1.** Primers used in this study

| Plasmids                      | Primers | Sequences (5'-3')                                       |
|-------------------------------|---------|---------------------------------------------------------|
| Generating vp1 mutant         | #1      | GCTCGAGTTTTTCAGCAAGATAATATTGTTCCAGGACAAAGCGGTATCTC      |
|                               | #2      | CGCAATTGTCACGCCATGGTGGCCATCTAGGCCTCCGAGAGCTTGCCGCTCGTAG |
|                               | #3      | CTGTGCGGCCGCATTAATAGGCCTGAGTGGCCAAGCTCCAGAAAGCTTGAC     |
|                               | #4      | AGGAGATCTTCTAGAAAGATAATATTGTGCCGAGCCACTGATATG           |
| Complementation               | #5      | GCCATATGTTGTTCCAGGACAAAGCGGTATCTC                       |
|                               | #6      | ATGCGGCCGCTTTAACGAGCAGCGACTGTTTTG                       |
| p123-vp1                      | #7      | GCTTAACTATGCGGCAT                                       |
|                               | #8      | ATAGTCGGGGACGTCGTAGGGATACGCCGTAATGTACGATGG              |
|                               | #9      | CCTACGACGTCCCCGACTATGCCTACCACCTGTCACCTACTG              |
|                               | #10     | AAGACCGGCAACAGGATTCAATC                                 |
| p123-otef-HA-vp1              | #11     | TCCCCCGGGATGTTGGCAGCACTCTGG                             |
|                               | #6      | ATGCGGCCGCTTTAACGAGCAGCGACTGTTTTG                       |
| p123-gfp-vp1                  | #7      | GCTTAACTATGCGGCAT                                       |
|                               | #12     | CCTTGCTCACCGCCGTAATGTACGATGGTG                          |
|                               | #13     | CATTACGGCGGTGAGCAAGGGCGAGGAGCTG                         |
|                               | #14     | GGTATCTAGACTTGACAGCTCGTCCATGC                           |
|                               | #15     | GCTGTACAAGCTAGATACCACCTGTCACCTACTG                      |
|                               | #16     | AAGACCGGCAACAGGATTCAATC                                 |
| p123-vp1-gfp                  | #7      | GCTTAACTATGCGGCAT                                       |
|                               | #17     | GCCCTTGCTCACTCTAGAACGAGCAGCGACTGTTTTGC                  |
|                               | #18     | GTTCTAGAGTGAGCAAGGGCGAGGAG                              |
|                               | #19     | CGATCTGCAGCCGGGCGGCCGCTTTACTTGACAGCTCGTCC               |
| p123-Uhvp1                    | #7      | GCTTAACTATGCGGCAT                                       |
|                               | #20     | CGAGAGCTTGCCGCTCGTAG                                    |
|                               | #21     | CAAGCTCTCGGAATGATTGCTCGATTACCAATC                       |
|                               | #22     | CGATCTGCAGCCGGGCGGCCGCTCTAGAAGCCCATCTCCGTG              |
| p123-Srvp1                    | #7      | GCTTAACTATGCGGCAT                                       |
|                               | #20     | CGAGAGCTTGCCGCTCGTAG                                    |
|                               | #23     | CAAGCTCTCGGAATGGGTGAGCGATCCGGGCG                        |
|                               | #24     | CGATCTGCAGCCGGGCGGCCGCTTCAAACGGCAGCAGCGCTGC             |
| p123-Ssvp1                    | #7      | GCTTAACTATGCGGCAT                                       |
|                               | #20     | CGAGAGCTTGCCGCTCGTAG                                    |
|                               | #25     | CTACGAGCGGCAAGCTCTCGGAATGACTTTGCGACCCCAGCTG             |
|                               | #26     | GATCTGCAGCCGGGCGGCCGCTTCACACGTGCGCAGAAGCAC              |
| p123-Mvp1                     | #7      | GCTTAACTATGCGGCAT                                       |
|                               | #20     | CGAGAGCTTGCCGCTCGTAG                                    |
|                               | #27     | CTACGAGCGGCAAGCTCTCGGAATGATGACGGTGGCTCCTTTC             |
|                               | #28     | GATCTGCAGCCGGGCGGCCGCTTCAATGCTGGTGGAGGATAC              |
| p123-SP <sub>vp1</sub> -Srvp1 | #7      | GCTTAACTATGCGGCAT                                       |
|                               | #29     | GACAGCTTGACGCCGTAATGTACGATGGTG                          |
|                               | #30     | CATTACGGCGTACAAGCTGTCTCCCGTGG                           |
|                               | #24     | CGATCTGCAGCCGGGCGGCCGCTTCAAACGGCAGCAGCGCTGC             |

|                                       |         |                                                       |
|---------------------------------------|---------|-------------------------------------------------------|
| p123-SP <sub>vp1</sub> -Uhvp1         | #7      | GCTTAACTATGCGGCAT                                     |
|                                       | #31     | GACAGCTTGACGCCGTAATGTACGATGGTG                        |
|                                       | #32     | CATTACGGCGTACAAGCTGTCGTCAGACG                         |
|                                       | #22     | CGATCTGCAGCCGGGCGGCCGCTCTAGAAGCCCATCTCCGTG            |
| p123-vp1-nls*                         | #7      | GCTTAACTATGCGGCAT                                     |
|                                       | #33     | GAAAGCCGGAAGAAAAAGGCACACTAGCCGCGGCGAAGCCCATCGGTGTC    |
|                                       | #34     | GCCTTTTTCTTCCGGCTTTCTTGCTGCCACGCAAGCGCAACAGTCGGTGCTCG |
|                                       | #35     | CCTTTGAGTGAGCTGATACC                                  |
| p123-otef-dSP-HA-<br>vp1              | #45     | TCCCCCGGGATGTATCCCTACGACGTCCCC                        |
|                                       | #6      | ATGCGGCCGCTTTAACGAGCAGCGACTGTTTTG                     |
| p123-vp1(Δnls)                        | #5      | GCCATATGTTGTTCAGGACAAAGCGGTATCTC                      |
|                                       | #46     | GGCGGCCCGCCTAGAAGCCCATCGGTGTCGGTG                     |
| p123-otef-vp1-HA                      | #11     | TCCCCCGGGATGTTGGCACGACTCTGG                           |
|                                       | #47     | CGGGGACGTCGTAGGGATATCTAGAACGAGCAGCGACTGTTTTG          |
|                                       | #48     | GATATCCCTACGACGTCCCCGACTATGCCTAGGCGGCCGCCCGGCTG       |
|                                       | #35     | CCTTTGAGTGAGCTGATACC                                  |
| p123-otef-vp1(Δnls)-HA                | #11     | TCCCCCGGGATGTTGGCACGACTCTGG                           |
|                                       | #49     | GACGTCGTAGGGATATCTAGAGAAGCCCATCGGTGTCGGTG             |
| p123-otef-vp1-mCherryHA               | #50     | GTTCTAGAAAGGGCGAGGAGGATAACATG                         |
|                                       | #51     | GGCGGCCGCTTAAGCGTAATCTGGAACATC                        |
| p123--otef-vp1(nls*)-<br>mCherryHA    | #11     | TCCCCCGGGATGTTGGCACGACTCTGG                           |
|                                       | #52     | CTTTCTAGAACGAGCAGCGACTGTTGC                           |
| p123-otef-vp1-mCherry                 | #50     | GTTCTAGAAAGGGCGAGGAGGATAACATG                         |
|                                       | #53     | CCGCGGCCGCTTTACTTGTACAGCTCGTCCATG                     |
| Localization                          | #36     | CAAGCTAATTCTGCAGTCGACATGGTGAGCAAGGGCGAGGAG            |
|                                       | #37     | CATTAAGCAGGACTCTAGATTAACGAGCAGCGACTGTTTTG             |
| pEZRK-gfp-vp1                         | #38     | GAGCTCAAGCTAATTCTGCAGTCGACATGTACCACCTGTCAAC           |
|                                       | #39     | CATTAAGCAGGACTCTAGATTACTTGTACAGCTCGTCCATG             |
| pEZRK-gfp-Uhvp1                       | #40     | CATGGACGAGCTGTACAAGTCTAGATACAAGCTGTCGTCAGAC           |
|                                       | #41     | CTCATTAAGCAGGACTCTAGACTAGAAGCCCATCTCCGTG              |
| pEZRK-gfp-vp1(nls*)                   | #36     | CAAGCTAATTCTGCAGTCGACATGGTGAGCAAGGGCGAGGAG            |
|                                       | #42     | CATTAAGCAGGACTCTAGATTAACGAGCAGCGACTGTTG               |
| pEZRK-rfp-virD2nls                    | #43     | GCTCAAGCTAATTCTGCAGTCGACATGGCCTCCTCCGAGGAC            |
|                                       | #44     | CTCATTAAGCAGGACTCTAGATTATAGGTGGATCCCGACGC             |
| Gene expression and fungal<br>biomass | ppi-F   | ACATCGTCAAGGCTATCG                                    |
|                                       | ppi-R   | AAAGAACACCGGACTTGG                                    |
|                                       | GAPDH-F | CTTCGGCATTGTTGAGGGTTTTG                               |
|                                       | GAPDH-R | TCCTTGGCTGAGGGTCCGTC                                  |
|                                       | vp1-F   | GGTCATCTACAACTGCCTCCCA                                |
|                                       | vp1-R   | CGGTGCTTTCTGTGTCTGTC                                  |
|                                       | See1-F  | TCAGGTGCAAGGAGAAGG                                    |
|                                       | See1-R  | ACAGAATACTCCGCTTCCC                                   |
|                                       | Srvp1-F | CACCGGGCACTTTCAAATATC                                 |
|                                       | Srvp1-R | CTTTTGGTGGTTCCGCTTTTCG                                |

**Table S2.** *U. maydis* strains used in this study

| Strain name                                  | Genotype                                                                          | Reference                  |
|----------------------------------------------|-----------------------------------------------------------------------------------|----------------------------|
| SG200                                        | <i>a1 mfa2 bW2</i>                                                                | Müller et al., 1999        |
| SG200Δvp1                                    | <i>a1 mfa2 bW2 Δmag00538 (vp1)</i>                                                | This study                 |
| SG200Δvp1-vp1                                | <i>a1 mfa2 bW2 Δvp1 ip'[P<sub>vp1</sub>:vp1]ip<sup>s</sup></i>                    | This study                 |
| SG200Δvp1-HA-vp1                             | <i>a1 mfa2 bW2 Δvp1 ip'[P<sub>vp1</sub>:HA-vp1]ip<sup>s</sup></i>                 | This study                 |
| SG200Δvp1-otef-HA-vp1                        | <i>a1 mfa2 bW2 Δvp1 ip'[P<sub>otef</sub>:HA-vp1]ip<sup>s</sup></i>                | This study                 |
| SG200Δvp1-gfp-vp1                            | <i>a1 mfa2 bW2 Δvp1 ip'[P<sub>vp1</sub>:gfp-vp1]ip<sup>s</sup></i>                | This study                 |
| SG200Δvp1-vp1-gfp                            | <i>a1 mfa2 bW2 Δvp1 ip'[P<sub>vp1</sub>:vp1-gfp]ip<sup>s</sup></i>                | This study                 |
| SG200Δvp1-vp1(nls*)                          | <i>a1 mfa2 bW2 Δvp1 ip'[P<sub>vp1</sub>:vp1nls*]ip<sup>s</sup></i>                | This study                 |
| SG200Δvp1-uhvp1                              | <i>a1 mfa2 bW2 Δvp1 ip'[P<sub>vp1</sub>:uhvp1]ip<sup>s</sup></i>                  | This study                 |
| SG200Δvp1-srvp1                              | <i>a1 mfa2 bW2 Δvp1 ip'[P<sub>vp1</sub>:srvp1]ip<sup>s</sup></i>                  | This study                 |
| SG200Δvp1-ssvp1                              | <i>a1 mfa2 bW2 Δvp1 ip'[P<sub>vp1</sub>:ssvp1]ip<sup>s</sup></i>                  | This study                 |
| SG200Δvp1-mpvp1                              | <i>a1 mfa2 bW2 Δvp1 ip'[P<sub>vp1</sub>:mpvp1]ip<sup>s</sup></i>                  | This study                 |
| SG200Δvp1-SP <sub>vp1</sub> -uhvp1           | <i>a1 mfa2 bW2 Δvp1 ip'[P<sub>vp1</sub>:SP<sub>vp1</sub>:uhvp1]ip<sup>s</sup></i> | This study                 |
| SG200Δvp1-SP <sub>vp1</sub> -srvp1           | <i>a1 mfa2 bW2 Δvp1 ip'[P<sub>vp1</sub>:SP<sub>vp1</sub>:srvp1]ip<sup>s</sup></i> | This study                 |
| SG200Δvp1-otef-dSP-HA-vp1                    | <i>a1 mfa2 bW2 Δvp1 ip'[P<sub>otef</sub>:dSP-HA-vp1]ip<sup>s</sup></i>            | This study                 |
| SG200Δvp1-vp1(Δnls)                          | <i>a1 mfa2 bW2 Δvp1 ip'[P<sub>vp1</sub>:vp1(Δnls)]ip<sup>s</sup></i>              | This study                 |
| SG200Δvp1-otef-vp1-HA                        | <i>a1 mfa2 bW2 Δvp1 ip'[P<sub>otef</sub>:vp1-HA]ip<sup>s</sup></i>                | This study                 |
| SG200Δvp1-otef-vp1(Δnls)-HA                  | <i>a1 mfa2 bW2 Δvp1 ip'[P<sub>otef</sub>:vp1(Δnls)-HA]ip<sup>s</sup></i>          | This study                 |
| SG200-otef-SP-Cmu1-HA                        | <i>a1 mfa2 bW2 ip'[P<sub>otef</sub>:SP-Cmu1-HA]ip<sup>s</sup></i>                 | Djamei et al., 2011        |
| SG200Δvp1-otef-vp1-mCherryHA                 | <i>a1 mfa2 bW2 Δvp1 ip'[P<sub>otef</sub>:vp1-mCherryHA]ip<sup>s</sup></i>         | This study                 |
| SG200Δvp1-otef-vp1(nls*)-mCherryHA           | <i>a1 mfa2 bW2 Δvp1 ip'[P<sub>otef</sub>:vp1(nls*)-mCherryHA]ip<sup>s</sup></i>   | This study                 |
| SG200Δvp1-otef-vp1-mCherry                   | <i>a1 mfa2 bW2 Δvp1 ip'[P<sub>otef</sub>:vp1-mCherry]ip<sup>s</sup></i>           | This study                 |
| SG200-otef-mCherry-HA                        | <i>a1 mfa2 bW2 ip'[P<sub>otef</sub>:mCherryHA]ip<sup>s</sup></i>                  | Provided by Regine Kahmann |
| SG200-P <sub>cmu1</sub> -SP-mCherry-AvitagHA | <i>a1 mfa2 bW2 ip'[P<sub>cmu1</sub>:SP-mCherry-AvitagHA]ip<sup>s</sup></i>        | Provided by Regine Kahmann |

## **Supplementary Reference**

- Djamei, A.; Schipper, K.; Rabe, F.; Ghosh, A.; Vincon, V.; Kahnt, J.; Osorio, S.; Tohge, T.; Fernie, A.R.; Feussner, I.; et al. Metabolic priming by a secreted fungal effector. *Nature* **2011**, *478*, 395-398, doi:10.1038/nature10454.
- Dutheil, J.Y.; Mannhaupt, G.; Schweizer, G.; C, M.K.S.; Munsterkotter, M.; Guldener, U.; Schirawski, J.; Kahmann, R. A Tale of Genome Compartmentalization: The Evolution of Virulence Clusters in Smut Fungi. *Genome Biol Evol* **2016**, *8*, 681-704, doi:10.1093/gbe/evw026.
- Kamper, J.; Kahmann, R.; Bolker, M.; Ma, L.J.; Brefort, T.; Saville, B.J.; Banuett, F.; Kronstad, J.W.; Gold, S.E.; Muller, O.; et al. Insights from the genome of the biotrophic fungal plant pathogen *Ustilago maydis*. *Nature* **2006**, *444*, 97-101, doi:10.1038/nature05248.
- Kijpornyongpan, T.; Mondo, S.J.; Barry, K.; Sandor, L.; Lee, J.; Lipzen, A.; Pangilinan, J.; LaButti, K.; Hainaut, M.; Henrissat, B.; et al. Broad Genomic Sampling Reveals a Smut Pathogenic Ancestry of the Fungal Clade Ustilaginomycotina. *Mol Biol Evol* **2018**, *35*, 1840-1854, doi:10.1093/molbev/msy072.
- Konishi, M.; Hatada, Y.; Horiuchi, J. Draft Genome Sequence of the Basidiomycetous Yeast-Like Fungus *Pseudozyma hubeiensis* SY62, Which Produces an Abundant Amount of the Biosurfactant Mannosylerythritol Lipids. *Genome Announc* **2013**, *1*, doi:10.1128/genomeA.00409-13.
- Lanver, D. et al. The biotrophic development of *Ustilago maydis* studied by RNAseq analysis. *Plant Cell* **25**, doi:10.1105/tpc.17.00764 (2018).
- Laurie, J.D.; Ali, S.; Linning, R.; Mannhaupt, G.; Wong, P.; Guldener, U.; Munsterkotter, M.; Moore, R.; Kahmann, R.; Bakkeren, G.; et al. Genome comparison of barley and maize smut fungi reveals targeted loss of RNA silencing components and species-specific presence of transposable elements. *Plant Cell* **2012**, *24*, 1733-1745, doi:10.1105/tpc.112.097261.
- Lorenz, S.; Guenther, M.; Grumaz, C.; Rupp, S.; Zibek, S.; Sohn, K. Genome Sequence of the Basidiomycetous Fungus *Pseudozyma aphidis* DSM70725, an Efficient Producer of Biosurfactant Mannosylerythritol Lipids. *Genome Announc* **2014**, *2*, doi:10.1128/genomeA.00053-14.
- Morita, T.; Koike, H.; Koyama, Y.; Hagiwara, H.; Ito, E.; Fukuoka, T.; Imura, T.; Machida, M.; Kitamoto, D. Genome Sequence of the Basidiomycetous Yeast *Pseudozyma antarctica* T-34, a Producer of the Glycolipid Biosurfactants Mannosylerythritol Lipids. *Genome Announc* **2013**, *1*, e0006413, doi:10.1128/genomeA.00064-13.
- Müller, P.; Aichinger, C.; Feldbrügge, M.; Kahmann, R. The MAP kinase kpp2 regulates mating and pathogenic development in *Ustilago maydis*. *Mol Microbiol* **1999**, *34*, 1007-1017, doi:10.1046/j.1365-2958.1999.01661.x.
- Rabe, F.; Bosch, J.; Stirnberg, A.; Guse, T.; Bauer, L.; Seitner, D.; Rabanal, F.A.; Czedik-Eysenberg, A.; Uhse, S.; Bindics, J.; et al. A complete toolset for the study of *Ustilago bromivora* and *Brachypodium* sp. as a fungal-temperate grass pathosystem. *eLife* **2016**, *5*, doi:10.7554/eLife.20522.
- Redkar, A.; Hoser, R.; Schilling, L.; Zechmann, B.; Krzymowska, M.; Walbot, V.; Doeblemann, G. A Secreted Effector Protein of *Ustilago maydis* Guides Maize Leaf Cells to Form Tumors. *Plant Cell* **2015**, *27*, 1332-1351, doi:10.1105/tpc.114.131086.
- Schirawski, J.; Mannhaupt, G.; Munch, K.; Brefort, T.; Schipper, K.; Doeblemann, G.; Di Stasio, M.; Rossel, N.; Mendoza-Mendoza, A.; Pester, D.; et al. Pathogenicity determinants in smut fungi revealed by genome comparison. *Science* **2010**, *330*, 1546-1548, doi:10.1126/science.1195330.
- Sharma, R.; Mishra, B.; Runge, F.; Thines, M. Gene loss rather than gene gain is associated with a host jump from monocots to dicots in the Smut Fungus *Melanopsichium pennsylvanicum*. *Genome Biol Evol* **2014**, *6*, 2034-2049, doi:10.1093/gbe/evu148.
- Zambanini, T.; Buescher, J.M.; Meurer, G.; Wierckx, N.; Blank, L.M. Draft Genome Sequence of *Ustilago trichophora* RK089, a Promising Malic Acid Producer. *Genome Announc* **2016**, *4*, doi:10.1128/genomeA.00749-16.
